# Supplementary material for: An Investigation of Culicoides (Diptera: Ceratopogonidae) as Potential Vectors of Medically and Veterinary Important Arboviruses in South Africa
Source: MDPI journal article supplement (doi:10.3390/v13101978), 2021-10-01
Supplement: s1 [file s1]

## Supplementary Material

**Table S1:** *Culicoides* species morphologically identified from sub samples collected at six vector surveillance sites in South Africa from 2012-2017 using 220V Onderstepoort Light traps. Adapted from [5].

| <i>Culicoides</i><br>species | Kruger<br>National<br>Park | Mnisi | Marakele<br>National<br>Park | Lapalala | Kyalami | Gauteng | Total |
|------------------------------|----------------------------|-------|------------------------------|----------|---------|---------|-------|
| <i>C. albopunctatus</i>      | 3                          |       |                              |          |         |         | 3     |
| <i>C. bolitinos</i>          | 9                          |       | 1                            |          |         | 2       | 12    |
| <i>C. enderleini</i>         | 7                          | 2     | 2                            |          |         |         | 11    |
| <i>C. eriodendroni</i>       | 2                          |       |                              |          |         |         | 2     |
| <i>C. exspectator</i>        | 27                         | 8     |                              |          |         |         | 35    |
| <i>C. imcola</i>             | 49                         | 28    | 20                           | 12       | 45      | 43      | 197   |
| <i>C. leucosticus</i>        | 42                         | 7     | 3                            | 2        |         | 1       | 55    |
| <i>C. loxodontis</i>         | 2                          |       |                              |          |         |         | 2     |
| <i>C. neavei</i>             |                            | 1     |                              |          |         |         | 1     |
| <i>C. nevilli</i>            |                            | 1     |                              |          |         |         | 1     |
| <i>C. nigeriae</i>           | 3                          |       |                              |          |         |         | 3     |
| <i>C. nigripennis</i> grp    | 2                          |       |                              |          |         |         | 2     |
| <i>C. nivosus</i>            | 1                          | 5     | 2                            |          |         |         | 8     |
| <i>C. olyslageri</i>         | 2                          |       |                              |          |         |         | 2     |
| <i>C. pretoriensis</i>       | 4                          |       |                              |          |         |         | 4     |
| <i>C. punctithorax</i>       | 2                          |       |                              |          |         |         | 2     |
| <i>C. pycnosticus</i>        | 12                         | 1     | 6                            |          |         |         | 19    |
| <i>C. ravus</i>              | 11                         | 7     | 1                            |          |         |         | 19    |
| <i>C. schultzei</i>          |                            |       | 11                           |          |         |         | 11    |
| <i>C. similis</i>            | 4                          |       | 1                            |          |         |         | 5     |
| <i>C. sp. # 61</i>           | 1                          |       |                              |          |         |         | 1     |
| <i>C. subschultzei</i>       | 6                          | 7     |                              |          |         |         | 13    |
| <i>C. tropicalis</i>         |                            | 3     |                              |          |         |         | 3     |
| <i>C. tuttifrutti</i>        |                            | 6     |                              |          |         |         | 6     |
| <i>C. walkeri</i>            | 1                          |       |                              |          |         |         | 1     |
| Total                        | 190                        | 76    | 47                           | 14       | 45      | 46      | 418   |

**Table S2:** Collection information pertaining to the *Culicoides* pools screened in this study as well as phylogenetic and BLAST results, of the viruses (family and species) detected in midge pools. GenBank accession number are indicated where applicable.

| Pool ID    | Site     | Collection date | Family                  | Species | Sequence length (nt) | Accession number |
|------------|----------|-----------------|-------------------------|---------|----------------------|------------------|
| MAR 403-15 | Marakele | 2015 May        | <i>Peribunyaviridae</i> | INGV    | 152                  | NA               |
| MAR 278-14 | Marakele | 2014 Apr        | <i>Peribunyaviridae</i> | PEAV    | 152                  | NA               |
| LAP 066-13 | Lapalala | 2013 Feb        | <i>Peribunyaviridae</i> | Unknown | 711                  | MN270995         |
| GAU 093-14 | Boschkop | 2014 Feb        | <i>Peribunyaviridae</i> | SABV    | 152                  | NA               |
| MAR 085-13 | Marakele | 2013 Mar        | <i>Peribunyaviridae</i> | SABV    | 152                  | NA               |
| KYA 333-16 | Kyalami  | 2016 Nov        | <i>Peribunyaviridae</i> | SABV    | 152                  | NA               |
| KYA 352-17 | Kyalami  | 2017 Jan        | <i>Peribunyaviridae</i> | SABV    | 152                  | NA               |
| MAR 032-12 | Marakele | 2012 Nov        | <i>Peribunyaviridae</i> | SABV    | 152                  | NA               |
| MN 040-16  | Mnisi    | 2016 Feb        | <i>Peribunyaviridae</i> | SATV    | 152                  | NA               |
| MAR 538-16 | Marakele | 2016 May        | <i>Peribunyaviridae</i> | SBV     | 766                  | MN270994         |
| GAU 110-14 | Boschkop | 2014 Apr        | <i>Peribunyaviridae</i> | SHAV    | 152                  | NA               |
| GAU 272-16 | Boschkop | 2016 Apr        | <i>Peribunyaviridae</i> | SHAV    | 152                  | NA               |
| GAU 290-16 | Boschkop | 2016 Jun        | <i>Peribunyaviridae</i> | SHAV    | 152                  | NA               |
| GAU 372-17 | Boschkop | 2017 Jan        | <i>Peribunyaviridae</i> | SHAV    | 152                  | NA               |
| MN 048-16  | Mnisi    | 2016 Mar        | <i>Peribunyaviridae</i> | SHAV    | 152                  | NA               |
| GAU 388-17 | Boschkop | 2017 Mar        | <i>Peribunyaviridae</i> | SHUV    | 152                  | NA               |
| KYA 077-14 | Kyalami  | 2014 Feb        | <i>Peribunyaviridae</i> | SHUV    | 152                  | NA               |
| KYA 229-16 | Kyalami  | 2016 Feb        | <i>Peribunyaviridae</i> | SHUV    | 818                  | MN270996         |
| KYA 233-16 | Kyalami  | 2016 Mar        | <i>Peribunyaviridae</i> | SHUV    | 825                  | MN270997         |

|              |          |          |                         |      |            |                              |
|--------------|----------|----------|-------------------------|------|------------|------------------------------|
| KYA 358-17   | Kyalami  | 2017 Jan | <i>Peribunyaviridae</i> | SHUV | 538        | MN270998                     |
| LAP 152-13   | Lapalala | 2013 Sep | <i>Peribunyaviridae</i> | SHUV | 152        | NA                           |
| LAP 341-14   | Lapalala | 2014 Jun | <i>Peribunyaviridae</i> | SHUV | 152        | NA                           |
| LAP 775-17   | Lapalala | 2017 Feb | <i>Peribunyaviridae</i> | SHUV | 152        | NA                           |
| MAR 057.2-13 | Marakele | 2013 Feb | <i>Peribunyaviridae</i> | SHUV | 152        | NA                           |
| MAR 062-13   | Marakele | 2013 Feb | <i>Peribunyaviridae</i> | SHUV | 152        | NA                           |
| MAR 178-13   | Marakele | 2013 Oct | <i>Peribunyaviridae</i> | SHUV | 152        | NA                           |
| MAR 205-14   | Marakele | 2014 Jan | <i>Peribunyaviridae</i> | SHUV | 152        | NA                           |
| MAR 206-14   | Marakele | 2014 Jan | <i>Peribunyaviridae</i> | SHUV | 152        | NA                           |
| MAR 395-15   | Marakele | 2015 Feb | <i>Peribunyaviridae</i> | SHUV | 152        | NA                           |
| MN 055-16    | Mnisi    | 2016 Apr | <i>Peribunyaviridae</i> | SHUV | 434<br>395 | MN270999 (S)<br>MN271000 (M) |
| MN 043-16    | Mnisi    | 2016 Feb | <i>Peribunyaviridae</i> | SHUV | 152        | NA                           |
| MN 045-16    | Mnisi    | 2016 Feb | <i>Peribunyaviridae</i> | SHUV | 152        | NA                           |
| KRU 139-16   | Mnisi    | 2016 Nov | <i>Peribunyaviridae</i> | SHUV | 152        | NA                           |
| GAU 001-13   | Boschkop | 2013 Mar | <i>Reoviridae</i>       | EEV  | 401        | MN271011                     |
| GAU 093-14   | Boschkop | 2014 Feb | <i>Reoviridae</i>       | EEV  | 401        | MN271003                     |
| GAU 407-17   | Boschkop | 2017 Apr | <i>Reoviridae</i>       | EEV  | 401        | MN271008                     |
| KYA 008-13   | Kyalami  | 2013 Feb | <i>Reoviridae</i>       | EEV  | 401        | MN271012                     |
| KYA 073-14   | Kyalami  | 2014 Feb | <i>Reoviridae</i>       | EEV  | 401        | MN271009                     |
| KYA 262-16   | Kyalami  | 2016 May | <i>Reoviridae</i>       | EEV  | 401        | MN271001                     |
| LAP 059-13   | Lapalala | 2013 Feb | <i>Reoviridae</i>       | EEV  | 401        | MN271017                     |
| LAP 047-13   | Lapalala | 2013 Jan | <i>Reoviridae</i>       | EEV  | 401        | MN271016                     |

|              |          |           |                   |     |                  |          |
|--------------|----------|-----------|-------------------|-----|------------------|----------|
| LAP 050-13   | Lapalala | 2013 Jan  | <i>Reoviridae</i> | EEV | 401              | MN271015 |
| LAP 299-14   | Lapalala | 2014 Apr  | <i>Reoviridae</i> | EEV | 401              | MN271018 |
| LAP 304-14   | Lapalala | 2014 Apr  | <i>Reoviridae</i> | EEV | 401              | MN271002 |
| LAP 250-14   | Lapalala | 2014 Feb  | <i>Reoviridae</i> | EEV | 401              | MN271022 |
| LAP 216-14   | Lapalala | 2014 Jan  | <i>Reoviridae</i> | EEV | 401              | MN271020 |
| LAP 276-14   | Lapalala | 2014 Mar  | <i>Reoviridae</i> | EEV | 401              | MN271021 |
| LAP 287-14   | Lapalala | 2014 Mar  | <i>Reoviridae</i> | EEV | 401              | MN271013 |
| LAP 288-14   | Lapalala | 2014 Mar  | <i>Reoviridae</i> | EEV | No sequence data | NA       |
| LAP 292-14   | Lapalala | 2014 Mar  | <i>Reoviridae</i> | EEV | 401              | MN271010 |
| LAP 314-14   | Lapalala | 2014 May  | <i>Reoviridae</i> | EEV | No sequence data | NA       |
| LAP 531-15   | Lapalala | 2015 Oct  | <i>Reoviridae</i> | EEV | No sequence data | NA       |
| LAP 588-16   | Lapalala | 2016 Feb  | <i>Reoviridae</i> | EEV | No sequence data | NA       |
| LAP 601-16   | Lapalala | 2016 Marc | <i>Reoviridae</i> | EEV | No sequence data | NA       |
| LAP 775-17   | Lapalala | 2017 Feb  | <i>Reoviridae</i> | EEV | 401              | MN271014 |
| MAR 037-12   | Marakele | 2012 Dec  | <i>Reoviridae</i> | EEV | 401              | MN271004 |
| MAR 057.2-13 | Marakele | 2013 Feb  | <i>Reoviridae</i> | EEV | 401              | MN271005 |
| MAR 058.2-13 | Marakele | 2013 Feb  | <i>Reoviridae</i> | EEV | No sequence data | NA       |
| MAR 068-13   | Marakele | 2013 Feb  | <i>Reoviridae</i> | EEV | 401              | MN271006 |
| MAR 075-13   | Marakele | 2013 Mar  | <i>Reoviridae</i> | EEV | 401              | MN271019 |

|            |          |          |                      |                |                   |          |
|------------|----------|----------|----------------------|----------------|-------------------|----------|
| MAR 289-14 | Marakele | 2014 Apr | <i>Reoviridae</i>    | EEV            | No sequence data  | NA       |
| MAR 304-14 | Marakele | 2014 May | <i>Reoviridae</i>    | EEV            | No sequence data  | NA       |
| MAR 509-16 | Marakele | 2016 Feb | <i>Reoviridae</i>    | EEV            | 401               | MN271007 |
| MN 014-15  | Mnisi    | 2015 Aug | <i>Rhabdoviridae</i> | Rhabdo viridae | *No sequence data | NA       |
| MN 009-15  | Mnisi    | 2015 Jun | <i>Rhabdoviridae</i> | Rhabdo viridae | 310               | MN270991 |
| MN 023-15  | Mnisi    | 2015 Nov | <i>Rhabdoviridae</i> | Rhabdo viridae | 310               | MN270993 |
| MN 047-16  | Mnisi    | 2016 Mar | <i>Rhabdoviridae</i> | Rhabdo viridae | 310               | MN270992 |
| MN 029-15  | KNP      | 2015 Nov | <i>Togaviridae</i>   | MIDV           | 198               | NA       |
| MN 036-16  | KNP      | 2016 Dec | <i>Togaviridae</i>   | MIDV           | 198               | NA       |

SHUV: Shuni Virus; PEAV: Peaton; SHAV: Shamonda virus, SABV: Sabo virus, SANV: Sango virus, SBV: Schmallerberg virus, SATV: Satuperi virus; INGV: Ingwavuma virus; EEV: Equine encephalitis virus. No sequence data: Detection of virus by EEV-specific FAM-TaqMan® probe or \*incomplete sequence.
